1 Closing the gap towards a successful referral system. A  
2 case study of a tertiary teaching and referral hospital,  
3 Kenya: pre-posttest study design  
4

5 Authors: Maxwell Philip Omondi<sup>1\*</sup>

6  
7  
8 <sup>1</sup> Orthopedic Unit, Department of Surgery, University of Nairobi, Kenya  
9

10 \*Corresponding author

11 Email address: [maxwellomondi@gmail.com](mailto:maxwellomondi@gmail.com)  
12  
13  
14  
15  
16  
17  
18  
19  
20  
21  
22  
23  
24  
25  
26  
27  
28

29  
30  
31  
32  
33  
34  
35  
36  
37  
38  
39  
40  
41  
42  
43  
44  
45  
46  
47  
48  
49  
50  
51

## Abstract

Inappropriate utilization of higher-level health facilities and ineffective management of the referral processes in resource-limited settings is increasingly becoming a concern in health care management in developing countries. This is characterized by self-referrals and frequent bypassing of nearest health facilities. On 1<sup>st</sup> July 2021, Kenyatta National Hospital (KNH) did enforce the national referral guidelines that required patients have a formal referral letter to reduce the number of self-referrals, decongest KNH and allow KNH to function as a referral facility as envisioned by Kenya Health Sector Referral Implementation Guidelines of 2014, Kenya 2010 constitution and KNH legal statute of 1987. The purpose of this study was to analyse the effect of enforcement of referral guidelines on facility referrals to KNH. This was a pre-posttest study design. The study was conducted amongst the orthopedic facility referrals in 2021 with 222 and 246 before and after enforcement of referral guidelines respectively. Data collection was done through data abstraction. Data was analyzed using frequency distribution, pearson chi-square test and logistic regression. Nairobi County and its environs constituted over four-fifth of all facility referrals to KNH. Over two-thirds of the facility referrals to KNH were from government facilities. There was significant reduction in health facilities tiers 2 and 3 referring patients directly to KNH after enforcement of referral guidelines ( $p=0.002$ ). About 43 health facilities ceased referring patients to KNH with over two-thirds of these health facilities being private facilities. The major facility and patient factors that were associated with facility referrals to KNH were human resource capacity and availability and patient's preference. In conclusion, enforcement of the referral guidelines significantly reduced the lower tiers health facilities referring to KNH. We recommend

52 having written standard operating procedures on referrals based on the national referral  
53 guidelines with continued enforcement of the same to sustain the gains made.

54

55 Key words: referral guidelines, health facility referrals, Kenyatta National Hospital

56

57

58

59

## Background

60 Tertiary hospitals in resource-limited countries treat patients referred but in most cases  
61 are the first level of care for the vast majority of patients (1). One of the challenges in  
62 health care delivery in resource-limited settings is inappropriate utilization of tertiary  
63 health facilities that results in patients' congestion in referral hospitals with simple medical  
64 conditions that can be effectively managed at the lower peripheral health facilities. The  
65 majority of these patients are self-referred, bypassing lower-level health facilities in the  
66 process (2-5).

67

68 A study done in Lusaka demonstrated how University Teaching and Referral Hospital is  
69 congested due to bypassing of lower peripheral health facilities and as a result the tertiary  
70 facility effectively functions as a primary health care facility. The urban phenomenon of  
71 widespread self-referral is associated with low rates of formal referral from peripheral  
72 health facilities (4, 6). The net result is simple medical conditions end up being managed  
73 in high-cost referral health facilities leading to overcrowding, long waiting times, and  
74 scarce staff time consumed by lesser medical conditions at the expense of complex  
75 medical conditions. It is therefore imperative that attempts need to be made to ensure  
76 patients make use of lower health facilities by creating disincentives for patients by-  
77 passing these health facilities (1, 7). The bypassing of lower level health facilities also

78 cripples the primary health care system and this effectively ensures that primary health  
79 care facilities remain underused and inefficient (8). Taken together, this jeopardizes the  
80 appropriate delivery of primary, secondary, and tertiary health care

81  
82 In 2008, an assessment done in South African Public health sector revealed that patients  
83 were accessing the health system at inappropriate levels and bypassing primary health  
84 care to attend to regional and tertiary hospitals as their initial visit leading to overcrowding  
85 and unnecessary costs to the referral facilities (9). In cross-sectional study was done to  
86 review the self-referrals to a District-Regional Hospital in KwaZulu Natal, South Africa  
87 showed 36% were self-referrals. However, majority (64%) were appropriately referred  
88 with written referral letters (9).

89 A study on referral system in Nigeria showed that 92.9% reported to tertiary hospital  
90 directly without referral while 7.1% were referred. The result of this is overcrowding of the  
91 tertiary facilities with conditions that can be managed at lower level health facilities (7).

92  
93 In India health care system is characterised by overcrowding, lack of specialist doctors  
94 and effective referral system. Despite having a referral guideline that details referral of  
95 patients from lower levels to sub-district, district and then to tertiary hospitals, the actual  
96 practices are that patients go to any level of health care system without any referral (10).  
97 This creates burden on the secondary and tertiary level hospitals. In Taiwan where we  
98 have a free-access systems, bypass of primary care and seeking secondary care through  
99 self-referral is rampant despite Taiwan's government taking various initiatives to mitigate  
100 bypass (11).

101

102 Kenya is a low-income middle-income country. Kenya's health sector is one of the 14  
103 functions devolved to the 47 county governments as provided for in the Fourth Schedule  
104 of the 2010 constitution (12). There are six different levels or tiers of health care in Kenya.  
105 Tiers 1 -5 are managed by the county government and tier 6 by the national government.  
106 In this system patients are required to move from one tier to the next using a formal  
107 referral letter. Kenya has a pluralistic health sector consisting of private and non-  
108 governmental service providers alongside the government-run health facilities that is  
109 organized into six (6) tiers (Figure 1).

110

111

112 Figure 1: Six tiers of health care service delivery in Kenya (13)

113

114 Tiers 4 are Sub-County Hospitals, Nursing Homes and also include medium-sized private  
115 hospitals. Tier 5 are County Teaching and Referral Hospitals, large private as well as  
116 faith-based hospitals. Tier 6 are National Teaching and Referral Hospitals. In Kenya there  
117 are four teaching and referral hospitals: a) Mathari Hospital, b) Kenyatta National  
118 Hospital, c) Moi Teaching and Referral Hospital and d) National Spinal Injury Hospital.  
119 These tier 6 offer range of services similar to Tier V but additionally they offer specialised  
120 treatments in addition to having advanced infrastructure and are not only accessed by  
121 Kenyans but so serve East Africa and Central Africa.

122

123 Kenyatta National Hospital (KNH) was established as a National Referral and Teaching  
124 Hospital, to provide training and medical research. KNH was established in 1901 and  
125 became a State Corporation in 1987 and sits at the peak of the health referral system in

126 Kenya (14). According to the KNH Board order of 1987 contained in the Legal Notice No.  
127 109, the functions of KNH were spelled out as a) to receive patients on referral for  
128 specialized health care; b) to provide facilities for medical education for the University of  
129 Nairobi and other health allied courses; c) to contribute to national health planning (14).  
130 This understanding has been reinforced by the Kenya Health Sector Referral  
131 Implementation Guidelines, 2014, and the Constitution of Kenya 2010 which tasks KNH  
132 with the responsibility for health policy formulation (12, 15).

133  
134 Orthopaedic wards in KNH have consistently recorded the highest bed occupancy  
135 percent for the last couple of years. In 2018, 2019 and 2020 it recorded bed occupancy  
136 percent of 142.2%, 138.2% and 116.5% respectively against the KNH bed occupancy  
137 percent of 106.2%, 113.4% and 91.5% (16). This coupled with low nurse-patient ratio of  
138 1:10 compromises not only the quality of nursing care given to patients but also the ability  
139 of KNH to effectively perform its statutory obligations. Various studies have demonstrated  
140 that an appropriate nurse-patient ratio is associated with the reduction in medical errors,  
141 decubitus ulcers, hospital-acquired infections, long duration of hospital stay, high  
142 readmission rates, and compromised patient well-being and safety due to the nurse  
143 burnout (17-19).

144  
145 On 1<sup>st</sup> July 2021, KNH management made a decision to enforce the Kenya Health Sector  
146 Referral Guidelines 2014 that places KNH at the tip of the health sector referral system.  
147 This meant that patients will be seen based on referral letters from other health facilities  
148 to reduce the number of walk-in patients who would have otherwise been appropriately

149 seen at the peripheral health facilities. This would then allow KNH to focus on the  
150 management of complex medical conditions and allow uncomplicated medical conditions  
151 to be managed at lower-level health facilities. The purpose of this study was to analyse  
152 the effect of enforcement of referral guidelines on facility referrals to KNH. The findings  
153 of this study will help formulate policy and guidelines on orthopaedic and trauma essential  
154 care at the peripheral and tertiary health facilities in Nairobi Metropolitan Area and the  
155 country at large. It will also provide evidence-based information that will contribute to the  
156 review of Kenya Health Sector Referral Implementation Guidelines of 2014.

157

## 158 **Methods**

### 159 **Study design**

160 This was a pre-posttest study design. The national referral guideline was enforced on 1<sup>st</sup>  
161 July, 2021. The pretest covered 5 months before enforcement of referral guidelines  
162 (February 1, to June 30, 2021) while post-test covered 5 months after enforcement of the  
163 referral guidelines (August 1, to December 31, 2021). The variables compared were  
164 county, type of health facility (government or private) and health facility tier before and  
165 after enforcement of the referral guidelines. Enforcement of referral guidelines required  
166 that the referring health facility consults with KNH referral Office for concurrence before  
167 patients are referred to KNH and that patients should come with written official referral  
168 letters. This was to ensure only patients who require specialized orthopaedic and trauma  
169 care not available at the peripheral health facilities get admitted to KNH.

170 **Study area**

171 KNH is the largest teaching and referral hospital in East and Central Africa. KNH  
172 Orthopaedic Wards were the study area. KNH is based in Upperhill, Nairobi, the capital  
173 city of Kenya. It is located along Hospital Road, about 5km from the city centre. KNH has  
174 a bed capacity of 1,800, 6,000+ staff members, 50 wards, 22 out-patient clinics, 24  
175 theaters (16 specialized) and Accident & Emergency Department (14). Of the 1800 bed  
176 capacity, 96 beds are allocated to orthopaedic wards. KNH is a 10-floor storied building  
177 complex and the Orthopaedic wards are located on the 6<sup>th</sup> floor but we also have  
178 orthopaedic admissions in private wings on 9<sup>th</sup> and 10<sup>th</sup> floor. Orthopaedic patients with  
179 other co-morbidities also get admitted to other wards in KNH.

180 **Study duration**

181 The study duration was from 1<sup>st</sup> February 2021 to 31<sup>st</sup> December 2021. The referral  
182 guidelines were enforced from 1<sup>st</sup> July 2021. Data abstraction was conducted from 1<sup>st</sup>  
183 January to 31<sup>st</sup> March, 2022.

184

185 **Study population**

186 Orthopaedic inpatient caseload before and after enforcement of referral guidelines.

187

188 **Eligibility criteria**

189 **Inclusion criteria**

190 All orthopaedic and trauma facility referrals to KNH during the study period.

191



192 **Sample size calculation**

193 Sample size was calculated using an adjusted Casagrande formula for calculating sample  
194 sizes that compare two binomial distributions (20).

195 A sample size of 468 facility referrals were enrolled during the study period with 220 and  
196 248 facility referrals before and after the enforcement of national referral guidelines.

197 **Recruitment and sampling procedures**

198 Three (3) research assistants (RAs) were recruited to collect and abstract patient data  
199 from patient files. The RAs were health care workers with a diploma in Orthopedic  
200 Trauma and with some experience in research data collection. The Principal Investigator  
201 (PI) was the research coordinator for the data collection. The orthopedic and trauma  
202 admissions with facility referrals were identified from the a) admission desk of Health  
203 Information System at KNH Accident and Emergency Unit (A&E) b) KNH Orthopedic  
204 Outpatient clinic records (OC) c) KNH Corporate Outpatient Care (COC). They were then  
205 recorded in a logbook. This logbook served as a master register for all facility referred  
206 patients admitted and therefore the sampling frame for the study. All facility admissions  
207 were logged into the logbook from the admission books stationed in these three (3)  
208 services points. Proportional Population to Size (PPS) was then used to decide on the  
209 numbers to be sampled per month from each of these three services points so that the  
210 sample size would be a representative of the admissions by month from each of these  
211 three orthopedic admissions entry points (Table 1).

212

213

214 Table 1: Orthopaedic and trauma admissions to KNH stratified by point of admission,  
215 2021

|               | Month of the year, 2021` | Point of admission |        |     |       |
|---------------|--------------------------|--------------------|--------|-----|-------|
|               |                          | A&E                | Clinic | COC | Total |
| <b>Before</b> | February                 | 54                 | 3      | 3   | 60    |
|               | March                    | 40                 | 1      | 3   | 44    |
|               | April                    | 37                 | 0      | 3   | 40    |
|               | May                      | 33                 | 2      | 2   | 37    |
|               | June                     | 39                 | 1      | 1   | 41    |
|               | Total                    | 203                | 7      | 12  | 222   |
| <b>After</b>  | August                   | 42                 | 2      | 2   | 46    |
|               | September                | 52                 | 3      | 4   | 59    |
|               | October                  | 55                 | 2      | 4   | 59    |
|               | November                 | 20                 | 0      | 12  | 32    |
|               | December                 | 43                 | 2      | 3   | 48    |
|               | Total                    | 212                | 9      | 25  | 246   |

216  
217 The three (3) RAs were reporting to and working under the direction of the PI. The RAs  
218 were trained for two (2) days by the PI on the research protocol, data collection tools,  
219 data collection procedures and that included pilot testing of the data collection tools as  
220 well before the actual data abstraction.

221  
222 A written Informed consent was obtained from KNH Medical Research Department to  
223 have access to the patient's health records in the Health Information Office (Room 19).

## 224 **Variables**

- 225 a) Name of health facility County c) Facility Type (Government/Private) d) Health  
226 Facility Level/Tier e) Admission date (dd/mm/yyyy)

228 **Data collection procedures**

229 Data collection was done through a data abstraction form from the patient files.

230 **Data Abstraction form** – The three (3) RAs were trained on the data abstraction using  
231 a data abstraction form as per the research protocol. The PI reviewed all the filled-in  
232 abstraction forms for completeness and accuracy daily during the entire data collection  
233 period and providing regular feedback to the RAs on a timely manner to ensure data  
234 quality and compliance to the study protocol. All the completed and verified data  
235 abstraction forms were then collected and filed by the PI at the end of every week under  
236 a lockable cabinet.

237

238 **Ethical considerations**

239 The study protocol was presented to UoN/KNH Ethics and Research Committee and was  
240 granted ethical approval (ERC No: P852/10/2021). Administrative approval was also  
241 granted by KNH Medical Research Department and KNH Orthopaedics Department.

242

243 **Data management, analysis, and presentation plan**

244 Data abstraction tool was designed to collect quantitative and qualitative data. For  
245 anonymity and confidentiality purposes the data abstraction tool were marked only with  
246 the participant study numbers and no names were used. However, the research  
247 assistants and the PI had access to the patients charts and therefore could identify  
248 individual patients during the data collection period. The data were entered into a  
249 password-protected Redcap database kept by the KNH Medical Research Department.  
250 The data were analyzed using SPSS version 21.0. Descriptive statistics such as

251 frequencies while inferential statistics using Pearson’s chi-squared tests, logistic  
252 regression were used. The calculations were done at a 95% level of confidence.

## 253 **Findings**

### 254 **Basic Profile of the sample population**

255 A total of 468 charts were abstracted of which 220 (47%) were before and 248 (53%)  
256 were after the enforcement of the referral guidelines.

257  
258 Nairobi County constituted more than half of facility referrals to KNH. This rose to over  
259 four – fifths of facility referrals with inclusion of the neighbouring counties namely Kajiado,  
260 Kiambu and Machakos. Almost all the facility referrals were from within Kenya (Table 2).

261  
262 About three-fifths of the facility referrals to KNH were government health facilities with  
263 private health facilities comprising about two-fifths. About half of the facility referrals are  
264 from Tiers 2 to 4 and with the remainder of facility referrals to KNH from Tier 5 and 6  
265 (Table 2).

266  
267

268  
269

270  
271

272  
273

274

275

276 Table 2: Basic profile of the sample population, 2021.

| Variable                       | Category   | Frequency<br>(n=222) | Percent | Cumulative<br>percent | Frequency<br>(n=246) | Percent | Cumulative<br>percent |
|--------------------------------|------------|----------------------|---------|-----------------------|----------------------|---------|-----------------------|
|                                |            |                      | Before  |                       |                      | After   |                       |
| <b>County</b>                  | Nairobi    | 133                  | 59.9%   | 59.9%                 | 136                  | 55.3%   | 55.2%                 |
|                                | Kiambu     | 31                   | 14.0%   | 73.9%                 | 31                   | 12.6%   | 67.8%                 |
|                                | Kajiado    | 17                   | 7.7%    | 81.6%                 | 26                   | 10.5%   | 78.3%                 |
|                                | Machakos   | 4                    | 1.8%    | 83.4%                 | 4                    | 1.6%    | 79.9%                 |
|                                | Nakuru     | 4                    | 1.8%    | 85.2%                 | 2                    | 0.8%    | 80.7%                 |
|                                | Others     | 6                    | 2.7%    | 87.9%                 | 15                   | 6.1%    | 86.8%                 |
|                                | Central    |                      |         |                       |                      |         |                       |
|                                | Others     | 22                   | 9.9%    | 98.3%                 | 22                   | 8.9%    | 95.7%                 |
|                                | Eastern    |                      |         |                       |                      |         |                       |
|                                | Others*    | 5                    | 2.2%    | 100.0%                | 10                   | 4.0%    | 99.7%                 |
| Burundi                        | 0          | 0.0%                 | 100.0%  | 1                     | 0.4%                 | 100.1%  |                       |
| <b>Type of Health Facility</b> | Government | 140                  | 63.1%   | 63.1%                 | 146                  | 59.3%   | 59.3%                 |
|                                | Private    | 82                   | 36.9%   | 100.0%                | 100                  | 40.7%   | 100.0%                |
| <b>Health Facility Tier</b>    | 2          | 14                   | 6.3%    | 6.3%                  | 2                    | 0.8%    | 0.8%                  |
|                                | 3          | 23                   | 10.4%   | 16.7%                 | 15                   | 6.1%    | 6.9%                  |
|                                | 4          | 74                   | 33.3%   | 50.0%                 | 106                  | 43.1%   | 50.0%                 |
|                                | 5          | 102                  | 45.9%   | 95.9%                 | 109                  | 44.3%   | 94.3%                 |
|                                | 6          | 9                    | 4.1%    | 100.0%                | 14                   | 5.7%    | 100.0%                |

277 Others\* include facility referrals from former Coast, North Eastern, Nyanza, Western and  
278 Rift Valley regions of Kenya

279

280

281

282

283

284 Figure 2: The major health facilities referring to KNH before and after enforcement of  
285 referral guidelines, 2021

286

287 Mama Lucy Kibaki Hospital, Mbagathi District Hospital and Thika Level 5 Hospital were  
288 the major health facilities referring patients to KNH before and after enforcement of the  
289 referral guidelines (Figure 2).

290 There were increases in the health facility referrals to KNH after the enforcement of the  
 291 referral guidelines. However, these increases were not statistically significant differences  
 292 (Table 3).

293 Table 3: Bivariable analysis of the type of health facilities referrals referring to KNH  
 294 before and after enforcement of referral guidelines, 2021

|                                |                               | Before<br>(n=222) | After (n=246) | p-value  |
|--------------------------------|-------------------------------|-------------------|---------------|----------|
| <b>Type of Health Facility</b> | Government Facility referrals | 140 (49.0%)       | 146 (51.0%)   | p= 0.411 |
|                                | Private Facility referrals    | 82 (45.1%)        | 100 (54.9%)   |          |

295 Legend: Pearson  $\chi^2$  statistics test was used to test for statistical significance at 95% CI.

296  
 297 There were statistically significant differences in health facilities referrals to KNH before  
 298 and after the enforcement of the referral guidelines when stratified by the health facility  
 299 tier (Table 4). There was significant reduction in Tiers II and III referring patients directly  
 300 to KNH and an increase in the facility referrals to KNH from tiers IV, V and VI (Table 4).  
 301 There were less tier II and III health facilities referring patients to KNH after enforcement  
 302 of the referral guidelines. The facility referrals from Tier II were 90.8% less likely as  
 303 compared to Tier III after enforcement of the referral guidelines (p=0.006) (Table 4).

304  
 305 Table 4: Multivariable analysis of the health facilities referrals, stratified by health facility  
 306 tier, referring to KNH before and after enforcement of referral guidelines, 2021

|                             |     | Before<br>(n=222) | After (n=246) | Chi-square; p-value | Logistic regression |
|-----------------------------|-----|-------------------|---------------|---------------------|---------------------|
| <b>Health Facility Tier</b> | II  | 14 (87.5%)        | 2 (12.5%)     | 16.505;<br>p=0.002  | 1.0                 |
|                             | III | 23 (60.5%)        | 15 (39.5%)    |                     | 0.092 (p=0.006)     |
|                             | IV  | 74 (41.1%)        | 106 (58.9%)   |                     | 0.419 (p=0.108)     |
|                             | V   | 102 (48.3%)       | 109 (51.7%)   |                     | 0.921 (p=0.856)     |
|                             | VI  | 9 (39.1%)         | 14 (60.9%)    |                     | 0.687 (p=0.301)     |

307 Legend: Pearson  $\chi^2$  statistics test was used to test for statistical significance at 95% CI  
 308 and Odds Ratio was used to test the strength of association. 1.0 refers to reference group.

309  
 310 While the study showed about 43 health facilities ceased referring patients to KNH with  
 311 over two-thirds of these health facilities being private facilities (Table 5).

312 The study revealed that lower tiers health facilities namely tier II-IV ceased referring  
 313 patients to KNH and this comprised over four-fifths of all health facilities that stopped  
 314 referring to KNH after enforcement of the referral guidelines (Table 5).

315  
 316 Table 5: Frequency distribution of type of health facilities that stopped referring, stratified  
 317 by Type of Health Facility and Facility Tier, after enforcement of the referral guidelines,  
 318 2021

|                                | Categories | Frequency<br>(n=43) | Percent | Cumulative<br>percent |
|--------------------------------|------------|---------------------|---------|-----------------------|
| <b>Type of Health Facility</b> | Government | 14                  | 32.6%   | 32.6%                 |
|                                | Private    | 29                  | 67.4%   | 100.0%                |
| <b>Facility Tier</b>           | II         | 7                   | 16.3%   | 16.3%                 |
|                                | III        | 12                  | 27.9%   | 44.2%                 |
|                                | IV         | 16                  | 37.2%   | 81.4%                 |
|                                | V          | 6                   | 14.0%   | 95.4%                 |
|                                | VI         | 2                   | 4.7%    | 100.1%                |
|                                |            |                     |         |                       |

319  
 320 The major facility and patient factors that were associated with facility referrals to KNH  
 321 were human resource capacity and availability, health facility infrastructure, Orthopaedic  
 322 equipment's and implants availability, patient's preference, financial considerations  
 323 (Table 6). It's worth noting that across both private and government health facilities the  
 324 main factors for referral were inadequate human resource capacity and availability  
 325 followed by availability of medical supplies and equipments and financial considerations  
 326 (Table 6). Amongst government health facility referrals, whereas financial considerations  
 327 was among the common factors for facility referrals to KNH, the patients actually were  
 328 opting to be referred to KNH as opposed to a private health facility due to cost "...the

329 *patient needed a total knee replacement which could not be done in Nyahururu and they*  
330 *did not have enough funds to take him to a private hospital so they preferred to KNH...”*

331 *‘... the private hospital was too expensive so they opted for KNH...’*

332 Patients’ preference was shown to be a significant factor associated with private health  
333 facility referrals to KNH as opposed to government health facility referrals to KNH (Table  
334 6).

335 Table 6: Table showing the frequency distribution of the major facility and patient related  
336 factors to the orthopaedic and trauma admissions at the KNH

| <b>Factors</b>                                  | <b>Private health facilities referrals (n=182)</b> | <b>Government health facilities referrals (n=286)</b> |
|-------------------------------------------------|----------------------------------------------------|-------------------------------------------------------|
| <b>Human resource capacity and availability</b> | 105 (57.7%)                                        | 178 (62.2%)                                           |
| <b>Infrastructure</b>                           | 16 (8.8%)                                          | 25 (8.7%)                                             |
| <b>Medical supplies and equipment</b>           | 47 (25.8%)                                         | 74 (25.9%)                                            |
| <b>Finance</b>                                  | 42 (23.1%)                                         | 79 (27.6%)                                            |
| <b>Patient preference</b>                       | 72 (39.6%)                                         | 15 (5.2%)                                             |

337 Legend: This was a cumulative tally of the facility and patient related factors to the  
338 orthopaedic and trauma admissions at the KNH as a proportion of the sample size (n).

339

## 340 **Discussions**

341 While orthopaedic facility referrals were spread across the country, over four – fifths of  
342 these facility referrals were from Nairobi County and its environs. This is in tandem with  
343 studies done at tertiary teaching and referral health facilities in Rwanda, Tanzania, Malawi  
344 and Nigeria that revealed significant majority of the facility referrals are from within the  
345 region where the health facilities are co-located (7, 21-24).

346 Most of the facility referrals to KNH are from government health facilities with private  
347 health facilities comprising about one-third. This compares favourably with a study done



348 in Rwanda that showed approximately 85.7% of the facility referrals were from public  
349 hospitals while 10.7% of the referrals were from private health facilities (25). Similarly a  
350 prospective study done at Muhimbili National Hospital, Tanzania to examine the medical  
351 referral pattern of patients in 2004, revealed that about 22.4% of admissions were from  
352 public health facilities while only 4.2% were from private health facilities (26).

353 Mama Lucy Kibaki Hospital, Mbagathi District Hospital and Thika Level 5 Hospital were  
354 the major health facilities referring patients to KNH before and after enforcement of the  
355 referral guidelines and they all happen to be government health facilities – which comprise  
356 majority of health facility referrals to KNH as compared to private health facility referrals.  
357 This is probably because of inadequate human resource, inadequate infrastructure like  
358 bed capacity, theatre space as well as lack of orthopaedic equipments and implants.  
359 However, this contrasts with a study on referrals to a tertiary health facility in Nigeria that  
360 showed over half of the admissions were from private health facilities (7). In addition, St  
361 Peters Orthopaedic and Surgical Speciality Centre, St Francis Community Hospital, Arthi  
362 River Shalom Community Hospital and St Mary’s Mission Hospital were the most  
363 frequently referring private health facilities to KNH for orthopaedic admissions in 2021.  
364 These were probably due to inadequate human capacity, patients’ preference and  
365 financial considerations.

366

367 There were increases in the number of health facilities referring patients to KNH after the  
368 enforcement of the referral guidelines. This is in tandem with a study done in Republic of  
369 Honduras that showed the referral rate was observed to be higher when institutional  
370 managers emphasized the importance of the referral system (4). The enforcement of the

371 national referral guidelines meant more awareness on the referral requirements and  
372 importance of referrals of patients to the next level of care and this might have resulted in  
373 increase in the number of health facilities referring patients.

374 The enforcement of the national referral guidelines was meant to streamline the referral  
375 process from the peripheral health facilities to KNH and in the process allow KNH to  
376 manage complex orthopaedic cases that cannot be handled at the lower-level health  
377 facilities. All potential referring health facilities were required to refer patients to the next  
378 tier of health facility instead of referring directly to KNH and the higher tier health facilities  
379 were expected to seek concurrence before referring patients to KNH and that should be  
380 accompanied with an official referring letter. Due to the enforcement of these referral  
381 requirements, there was significant reduction in Tiers 2 and 3 referring patients directly to  
382 KNH and an increase in the patients being referred to KNH from tiers 4, 5 and 6.

383  
384 The study showed about 43 health facilities ceased referring patients to directly to KNH  
385 with over two-thirds of these health facilities being private facilities. This is in tandem with  
386 a study on Geographic accessibility to public and private health facilities done in Kenya  
387 in 2021 that revealed the private health facilities' distribution was skewed toward the  
388 urban counties (27). The implication of this is that a good number of private health facilities  
389 were no longer referred patients directly to KNH.

390 Lower tiers health facilities namely tier 2 and 3 largely reduced patient referrals to KNH  
391 and this together with tier 4 comprised over four-fifths of all health facilities that stopped  
392 referring to KNH after enforcement of the referral guidelines. This is because these lower-  
393 tier facilities were now required to refer patients to the nearest Tier 4 and 5 health facilities

394 as their first referral point. This means that the enforcement of the national referral  
395 guidelines did reduce referrals from lower tier health facilities and probably were referring  
396 them to the next tier facility. This may explain why the numbers of higher tiers referring  
397 patients to KNH increased after the enforcement of the referral guidelines.

398 Human resource capacity remains a major factor in health facility referrals both for private  
399 and government health facilities. Inadequate human resource does also comprise the  
400 quality of care provided at the health facilities. This is in tandem with a study finding in  
401 Kenya that revealed Human resources for health was inadequately financed with  
402 insufficient number of health workers and there was maldistribution of staff in favor of  
403 higher-level facilities and in urban cities and this resulted in unnecessary referrals to  
404 higher level consequently compromised quality of primary healthcare (28-30). A number  
405 of studies in Brazil, Japan, United States of America and in Low- and Middle-income  
406 countries have also demonstrated inadequate human resource capacity and availability  
407 as the main reasons for patient referrals (31-35). However, this contradicts a study done  
408 in China on types of health care facilities and the quality of primary care revealed that  
409 Community Health Centers offer quality health care services than the secondary and  
410 tertiary health care hospitals (36). This was largely due to the fact that it was Chinese  
411 deliberate government policy to support and improve the capacity of the of the Community  
412 Health Centers.

413  
414 Private health facility referrals to KNH were to significant extent dictated by patients'  
415 preference. This could be due to perceived good quality of care but also due to perceived  
416 low cost of medical care in KNH by virtue of it being a government national referral

417 hospital. Studies done in California, USA and Islamic Republic of Iran, Cape Town, South  
418 Africa did show that the perception of good quality of care does influence choice of health  
419 facility (3, 37-39).

420  
421 The study had a few limitations. First, the effect of COVID 19 pandemic on facility referrals  
422 of cases from peripheral health facilities and walk-in patients. This was mitigated by  
423 ensuring the data collection period covered the covid period where intercounty movement  
424 restrictions were lifted. secondly, this study is retrospective and a quasi-experimental  
425 study design and hence weaker in determining causality. Despite these limitations, given  
426 the paucity of published literature in this study topic, this study offers key information on  
427 the effects of enforcement of referral guidelines in health facility referrals to KNH with  
428 important lessons for Kenya and possible sub-Saharan Africa.

429

### 430 **Conclusions**

431

432 The enforcement of the national referral guidelines did reduce the number of facility  
433 referrals from lower tier health facilities with a good number of private health facilities  
434 stopped referring patients to KNH altogether. The major facility and patient factors that  
435 were associated with facility referrals to KNH were human resource capacity and  
436 availability, health facility infrastructure, Orthopaedic equipment's and implants  
437 availability, patient's preference, financial considerations. Therefore, it is possible to  
438 successfully enforce the implementation of referral guidelines.

439

### 440 **Recommendations**

#### 441 **Recommendations to Policy Makers/ County Government**

- 442 1. Regularly sensitize the health facilities on the implementation of the national  
443 referral guidelines 2014 for continued enforcement of the referral guidelines;
- 444 2. Strengthen the human resource capacity and availability to minimize on referrals  
445 to KNH and this will consequently strengthen the primary and tertiary level  
446 orthopaedic and trauma care and help decongest KNH and allow it to function as  
447 a premier referral facility as per its statutory obligations;
- 448 3. Develop, disseminate and train health facilities on standard operating procedures  
449 based on the national referral guidelines and ensure adherence to the same.

#### 450 **Recommendations to KNH**

- 451 1. Educate and sensitize the health facilities on the role of KNH as a premier National  
452 Teaching and Referral facility that is mandated to manage complex referrals and  
453 should not be the first point of contact for patients seeking orthopaedic care;
- 454 2. Develop, disseminate and train KNH staff from A&E department, Orthopedic Clinic  
455 and Corporate Outpatient Centre on the national referral guidelines and referral  
456 standard operating procedures.

#### 457 **Recommendations to Health Facilities**

- 458 1. Ensure adherence to the national referral guidelines of 2014 for an effective  
459 referral process and to ensure optimum utilization of primary, secondary and  
460 tertiary level of care.

461

#### 462 **Data availability**

463

464 Data is available and has been uploaded in the submission portal.

465

## 466 **Conflict of interests**

467

468 The author has no conflict of interest to declare.

469

## 470 **Funding statements**

471

472 This study was partially funded by Kenyatta National Hospital RFA 2020/21.

473

## 474 **Acknowledgements**

475

476 We would like to sincerely acknowledge the work of Brian Okinyi and Micah J. Kipkemei

477

477 for commitment and assistance in data collection process.

478

479

## 479 **References**

480

480 1. Hensher M, Price M, Adomakoh S. Referral Hospitals. Disease Control Priorities  
481 in Developing Countries 2nd edition Washington (DC): The International Bank for  
482 Reconstruction and Development / The World Bank; 2006 2nd Edition ed. New York:  
483 Oxford University Press; 2006. p. 1229 - 43.

484

484 2. Holdsworth G, Garner PA, Harphan T. Crowded outpatient departments in city  
485 hospitals of developing countries: a case study from Lesotho. Int J Health Plann Manage.  
486 1993 Oct-Dec;8(4):315-24.

487

487 3. London L, Bachmann OM. Pediatric utilization of a teaching hospital and a  
488 community health center. Predictors of level of care used by children from Khayelitsha,  
489 Cape Town. S Afr Med J. 1997 Jan;87(1):31-6.

490

490 4. Ohara K, Melendez V, Uehara N, Ohi G. Study of a patient referral system in the  
491 Republic of Honduras. Health Policy Plan. 1998 Dec;13(4):433-45.

492

492 5. Sanders D, Kravitz J, Lewin S, McKee M. Zimbabwe's hospital referral system:  
493 does it work? Health Policy Plan. 1998 Dec;13(4):359-70.

- 494 6. Nordberg E, Holmberg S, Kiugu S. Exploring the interface between first and  
495 second level of care: referrals in rural Africa. *Trop Med Int Health*. 1996 Feb;1(1):107-11.
- 496 7. Akande T. Referral system in Nigeria: Study of a tertiary health facility. *Annals of*  
497 *African Medicine*. 2004;3(3):130 - 3.
- 498 8. Stefanini A. District hospitals and strengthening referral systems in developing  
499 countries. *World Hosp Health Serv*. 1994;30(2):14-9.
- 500 9. Pillay I, Mahomed OH. Prevalence and determinants of self-referrals to a District-  
501 Regional Hospital in KwaZulu Natal, South Africa: a cross sectional study. *Pan Afr Med*  
502 *J*. 2019; 33:4.
- 503 10. Godlee F. Operationalizing an effective referral system in India. *BMJ* Yale.  
504 2015;351.
- 505 11. Liang L, Huang N, Shen Y, Chen A, Chou Y. Do patients bypass primary care for  
506 common health problems under a free-access system? Experience of Taiwan. *BMC*  
507 *Health Service Research* 2020;1050.
- 508 12. GoK. Article 6 of the Constitution of Kenya 2010. Nairobi, Kenya; 2010.
- 509 13. (NCAPD) NCAfPaD, [Kenya], Ministry of Health (MOH), Central Bureau of  
510 Statistics (CBS), Macro. O. Kenya Service Provision Assessment Survey 2004.
- 511 14. MoH. Nairobi; 2021 [updated 2021; cited 2021 10th May]; Available from:  
512 <https://knh.or.ke/index.php/history/>
- 513 15. MoH. Kenya Health Policy 2014 – 2030. Nairobi, Kenya; 2014.
- 514 16. KNH IN-PATIENT STATISTICS REPORT 2018, 2019 & 2020 [database on the  
515 Internet]. 2020 [cited June 2020].

- 516 17. Duffield C, Diers D, O'Brien-Pallas L, Aisbett C, Roche M, King M, et al. Nursing  
517 staffing, nursing workload, the work environment and patient outcomes. *Appl Nurs Res.*  
518 2010 Nov;24(4):244-55.
- 519 18. Buerhaus JN. Policy Implications of Research on Nurse Staffing and Quality of  
520 Patient Care Policy, Politics, & Nursing Practice. 2000.
- 521 19. Sharma SK, Rani R. Nurse-to-patient ratio and nurse staffing norms for hospitals  
522 in India: A critical analysis of national benchmarks. *J Family Med Prim Care.* 2020 Jun  
523 2020;9(6):2631-7.
- 524 20. Casagrande JT, Pike MC, Smith PG. An improved approximation formula for  
525 calculating sample sizes for comparing two binomial distributions. *Biometrics* 1978;  
526 34:483-6
- 527 21. Simba DO, Mbembati NA, Museru LM, Lema LE. Referral pattern of patients  
528 received at the national referral hospital: challenges in low-income countries. *East Afr J*  
529 *Public Health.* 2008 Apr;5(1):6-9.
- 530 22. Pittalis C, Brugha R, Bijlmakers L, Mwapasa G, Borgstein E, Gajewski J. Patterns,  
531 quality and appropriateness of surgical referrals in Malawi. *Trop Med Int Health.* 2020  
532 Jul;25(7):824-33.
- 533 23. Theoneste N, Gabriel T, Jackline O, Rebecca M, Robert R, Neil G, et al. Referral  
534 patterns and predictors of referral delays for patients with traumatic injuries in rural  
535 Rwanda. *Global Surgery.* 2016;160(6):1636-44.
- 536 24. Premkumar A, Massawe HH, Mshabaha DJ, R.Foran J, XiaohanYing, Sheth NP.  
537 The burden of orthopaedic disease presenting to a referral hospital in northern Tanzania.  
538 *Global Surgery.* 2015;2(1):70-5.



- 539 25. Theoneste Nkurunziza, Gabriel Toma, Jackline Odhiambo, Rebecca Maine,  
540 Robert Riviello, Neil Gupta, et al. Referral patterns and predictors of referral delays for  
541 patients with traumatic injuries in rural Rwanda. *Global Surgery*. 2016;160(6):1636-44.
- 542 26. Simba DO, Mbembati NAA, Museru LML, E.K. L. Referral Pattern of Patients  
543 Received at the National Referral Hospital: Challenges in Low Income Countries. *East  
544 African Journal of Public Health*. 2008;5(1):6-9.
- 545 27. Moturi AK, Suiyanka L, Mumo E, Snow RW, Okiro EA, Macharia PM. Geographic  
546 accessibility to public and private health facilities in Kenya in 2021: An updated geocoded  
547 inventory and spatial analysis. *Front Public Health*. 2022; 10:1002975.
- 548 28. Nyawira L, Tsofa B, Musiega A, Munywoki J, Njuguna RG, Hanson K, et al.  
549 Management of human resources for health: implications for health systems efficiency in  
550 Kenya. *BMC Health Serv Res*. 2022 Aug 16;22(1):1046.
- 551 29. Wisborg T, Montshiwa TR, Mock C. Trauma research in low- and middle-income  
552 countries is urgently needed to strengthen the chain of survival. *Scand J Trauma Resusc  
553 Emerg Med*. 2011 Oct 24; 19:62.
- 554 30. Gwatkin DR, Bhuiya A, Victora CG. Making health systems more equitable.  
555 *Lancet*. 2004 Oct 2-8;364(9441):1273-80.
- 556 31. Viel IL, Moura BRS, Martuchi SD, de Souza Nogueira L. Factors Associated with  
557 Interhospital Transfer of Trauma Victims. *J Trauma Nurs*. 2019 Sep/Oct;26(5):257-62.
- 558 32. Garwe T, Cowan LD, Neas B, Cathey T, Danford BC, Greenawalt P. Survival  
559 benefit of transfer to tertiary trauma centers for major trauma patients initially presenting  
560 to nontertiary trauma centers. *Acad Emerg Med*. 2010 Nov;17(11):1223-32.

- 561 33. Newgard CD, McConnell KJ, Hedges JR, Mullins RJ. The benefit of higher level of  
562 care transfer of injured patients from nontertiary hospital emergency departments. J  
563 Trauma. 2007 Nov;63(5):965-71.
- 564 34. Pittalis C, Brugha R, Gajewski J. Surgical referral systems in low- and middle-  
565 income countries: A review of the evidence. PLoS One. 2019;14(9):e0223328.
- 566 35. Jumbam DT, Menon G, Lama TN, Lodge li W, Maongezi S, Kapologwe NA, et al.  
567 Surgical referrals in Northern Tanzania: a prospective assessment of rates, preventability,  
568 reasons and patterns. BMC Health Serv Res. 2020 Aug 8;20(1):725.
- 569 36. Hu R, Liao Y, Du Z, Hao Y, Liang H, Shi L. Types of health care facilities and the  
570 quality of primary care: a study of characteristics and experiences of Chinese patients in  
571 Guangdong Province, China. BMC Health Serv Res. 2016 Aug 2;16(a):335.
- 572 37. Luft HS, Garnick DW, Mark DH, Peltzman DJ, Phibbs CS, Lichtenberg E, et al.  
573 Does quality influence choice of hospital? JAMA. 1990 Jun 6;263(21):2899-906.
- 574 38. Bahadori M, Teymourzadeh E, Ravangard R, Nasiri A, Raadabadi M,  
575 Alimohammadzadeh K. Factors contributing towards patient's choice of a hospital clinic  
576 from the patients' and managers' perspective. Electron Physician. 2016 May;8(5):2378-  
577 87.
- 578 39. Nolan T, Angos P, Cunha AJ, Muhe L, Qazi S, Simoes EA, et al. Quality of hospital  
579 care for seriously ill children in less-developed countries. Lancet. 2001 Jan  
580 13;357(9250):106-10.

581  
582

### **Captions of supporting Information files**

583  
584

S1 Supporting Information – Working dataset 04.12.2023

- 585 S2 Supporting Information – Facilities stopped referring
- 586 S3 Supporting Information – Reasons for Referral spreadsheet
- 587 S4 Supporting Information – Reasons for Referral Tally spreadsheet
- 588 S5 Supporting Information – Referrals spreadsheet
- 589 S6 Supporting Information – Referral facilities spreadsheet
- 590 Other - ERB approval letter - ERC APPROVAL LETTER.pdf
- 591 Other - PLOSONe\_Human\_Subjects\_Research\_Checklist.doc

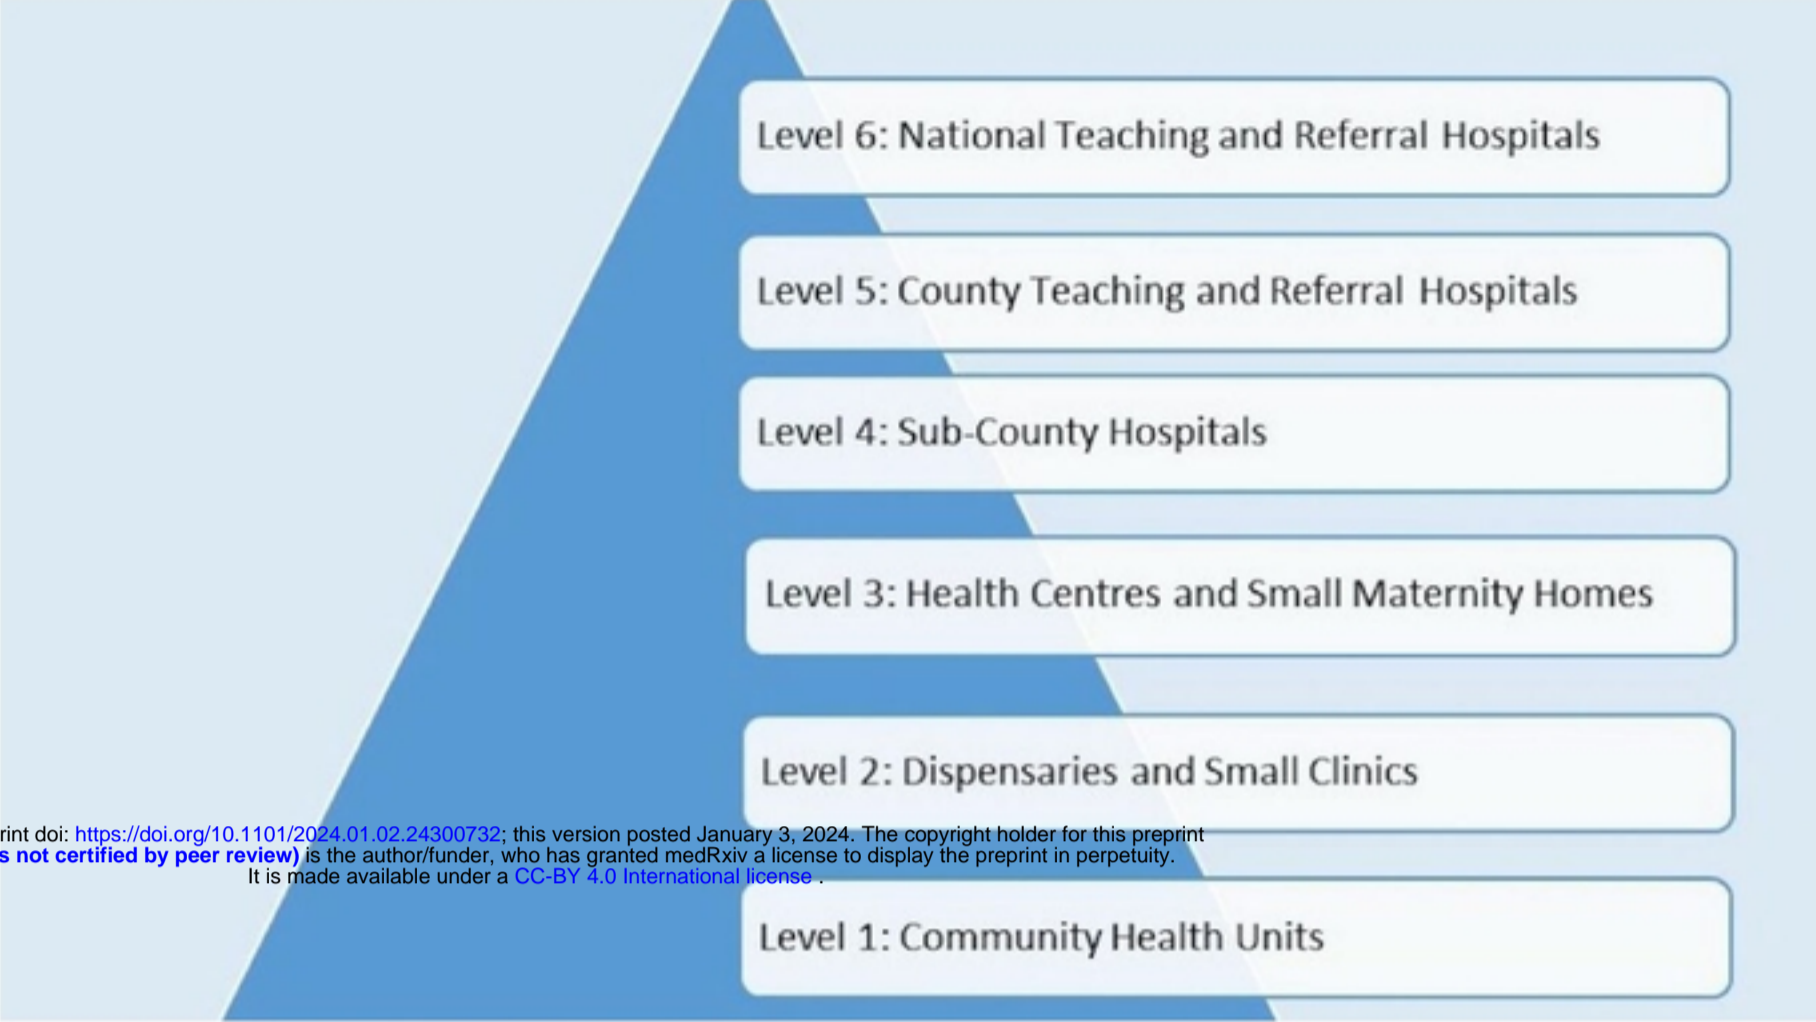

medRxiv preprint doi: <https://doi.org/10.1101/2024.01.02.24300732>; this version posted January 3, 2024. The copyright holder for this preprint (which was not certified by peer review) is the author/funder, who has granted medRxiv a license to display the preprint in perpetuity. It is made available under a [CC-BY 4.0 International license](https://creativecommons.org/licenses/by/4.0/).

Figure 1

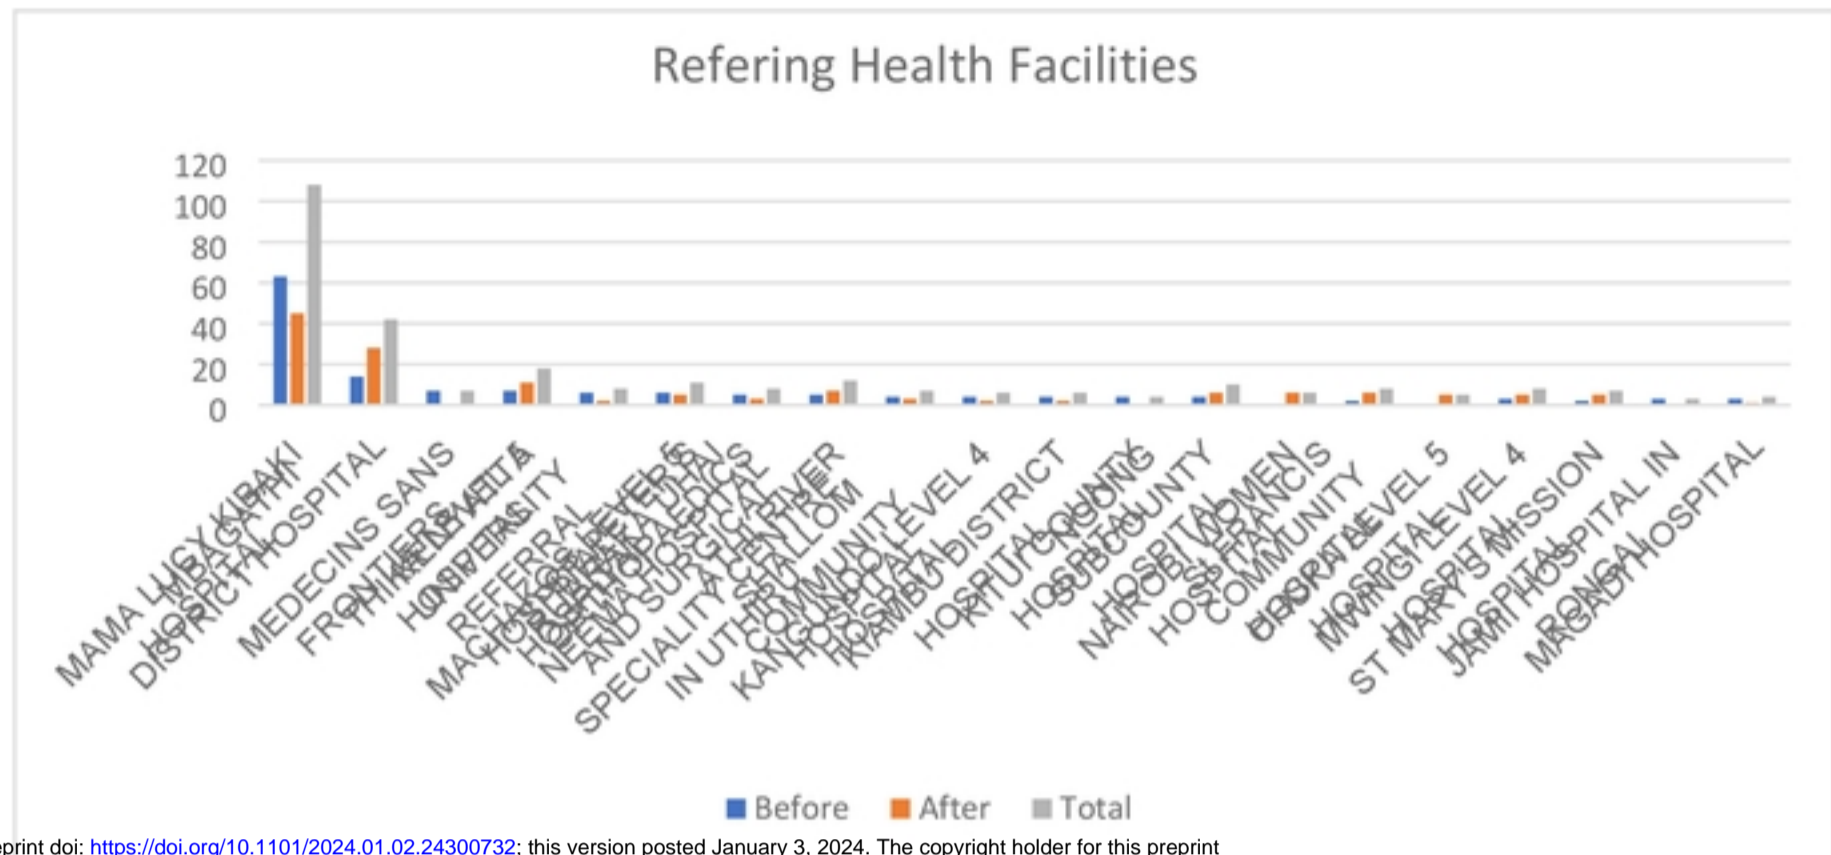

medRxiv preprint doi: <https://doi.org/10.1101/2024.01.02.24300732>; this version posted January 3, 2024. The copyright holder for this preprint (which was not certified by peer review) is the author/funder, who has granted medRxiv a license to display the preprint in perpetuity. It is made available under a [CC-BY 4.0 International license](https://creativecommons.org/licenses/by/4.0/).

Figure 2
